1 **OXSRI inhibits inflammasome activation by limiting potassium efflux during mycobacterial**  
2 **infection.**

3 Elinor Hortle<sup>1,2\*</sup>, Lam Vi Tran<sup>1</sup>, Angela RM Fontaine<sup>3</sup>, Natalia Pinello<sup>4,5</sup>, Justin J-L Wong<sup>4,5</sup>,  
4 Warwick J Britton<sup>1,6</sup>, Stefan H Oehlers<sup>1,2 \*</sup>

5

6 <sup>1</sup>Tuberculosis Research Program Centenary Institute, The University of Sydney, Camperdown,  
7 NSW 2050, Australia

8 <sup>2</sup>The University of Sydney, Discipline of Infectious Diseases & Immunology and Marie Bashir  
9 Institute, Camperdown, NSW 2050, Australia

10 <sup>3</sup> Centenary Imaging and Sydney Cytometry at the Centenary Institute, The University of  
11 Sydney, Camperdown, NSW 2050, Australia

12 <sup>4</sup> Epigenetics and RNA Biology Program Centenary Institute, The University of Sydney,  
13 Camperdown, NSW 2050, Australia

14 <sup>5</sup> The University of Sydney, Faculty of Medicine and Health, Camperdown, NSW 2050,  
15 Australia

16 <sup>6</sup> Department of Clinical Immunology, Royal Prince Alfred Hospital, Camperdown, NSW 2050,  
17 Australia

18

19 \* Co-corresponding author emails: [stefan.oehlers@sydney.edu.au](mailto:stefan.oehlers@sydney.edu.au) and  
20 [e.hortle@centenary.org.au](mailto:e.hortle@centenary.org.au)

21

22 **Summary**

23 Pathogenic mycobacteria inhibit inflammasome activation as part of their pathogenesis.

24 While it is known that potassium efflux is a trigger for inflammasome activation, the

25 interaction between mycobacterial infection, potassium efflux and inflammasome activation  
26 has not been investigated. Here we use *Mycobacterium marinum* infection of zebrafish  
27 embryos and *Mycobacterium tuberculosis* of human THP-1 cells to demonstrate that  
28 pathogenic mycobacteria upregulate the host WNK signalling pathway kinases SPAK and  
29 OXSR1 which control intracellular potassium balance. We show that genetic depletion or  
30 inhibition of OXSR1 decreases bacterial burden and intracellular potassium levels. The  
31 protective effects of OXSR1 depletion are mediated by NLRP3 inflammasome activation and  
32 are dependent on caspase-mediated release of IL-1 $\beta$  and the downstream activation of  
33 protective TNF- $\alpha$ . The elucidation of this druggable pathway to potentiate inflammasome  
34 activation provides a new avenue for the development of host-directed therapies against  
35 intracellular infections.

36

## 37 **Introduction**

38 Inflammasomes are large cytosolic multi-protein complexes that are critical for the immune  
39 response to infection. They facilitate the production of bioactive IL-1 $\beta$ <sup>1</sup>, which directs  
40 pathogen killing through upregulation of TNF- $\alpha$ <sup>2</sup> and orchestrates systemic immune control  
41 through paracrine signalling. Inflammasomes typically consist of a sensor protein, which  
42 detects specific stimuli within the cytosol, and an adaptor protein which facilitates the  
43 oligomerization of the sensor with pro-caspase-1<sup>3,4</sup>. Inflammasome assembly triggers  
44 activation of caspase-1, which then cleaves pro-IL-1 $\beta$  and pro-IL-18 into their active forms.  
45 Caspase-1 also cleaves Gasdermin D, the N-terminal fragment of which forms pores in the cell  
46 membrane, allowing secretion of active IL-1 $\beta$  and IL-18, and triggering cell death via  
47 pyroptosis<sup>4</sup>. These events contribute to host defence by both rapidly inducing the  
48 inflammatory response and limiting replication of intracellular pathogens.

49

50 To escape this immune control, many successful intracellular pathogens have evolved  
51 methods to limit inflammasome activation<sup>3</sup>. Influenza A, *Pseudomonas aeruginosa*,  
52 Baculovirus, Vaccinia virus, *Streptococcus pneumoniae*, Myxoma virus and *Yersinia*  
53 *pseudotuberculosis* have all been shown to limit IL-1 $\beta$  production by inhibiting caspase-1  
54 activation<sup>3</sup>. In the case of pathogenic mycobacteria, their interactions with inflammasome  
55 activation are more complex. One study has shown that *Mycobacterium tuberculosis* actively  
56 inhibits inflammasome activation via a zinc metalloprotease<sup>5</sup>, and that clinical isolates  
57 associated with severe disease evade NLRP3 activation<sup>6</sup>. Others have shown that *M.*  
58 *tuberculosis* induces both NLRP3 inflammasome and caspase-1 activation<sup>7-9</sup>. Further studies  
59 suggest that *M. tuberculosis* actively inhibits activation of the AIM2 inflammasome and  
60 dampens activation of the NLRP3 inflammasome by upregulation of NOS and IFN- $\beta$ <sup>1,9-12</sup>.

61

62 The NLRP3 inflammasome, one of the best studied inflammasomes, can be triggered by  
63 numerous stimuli, including ATP, heme, pathogen-associated RNA, and a variety of bacterial  
64 components<sup>13-17</sup>. Because these triggers are so diverse, it has been suspected that these  
65 activation stimuli are not detected by NLRP3 directly, but rather NLRP3 activation is the result  
66 of converging cellular signals. There is evidence that mitochondrial dysfunction, reactive  
67 oxygen species, and lysosomal damage contribute to NLRP3 activation (as reviewed  
68 elsewhere<sup>18,19</sup>). A common event that occurs downstream of almost every NLRP3 stimulus is  
69 potassium (K<sup>+</sup>) efflux. Studies have shown that K<sup>+</sup> ionophores stimulate NLRP3<sup>20</sup>, that high  
70 extracellular K<sup>+</sup> can inhibit NLRP3 activation<sup>21,22</sup>, and that K<sup>+</sup> efflux alone is sufficient to  
71 activate the NLRP3 inflammasome<sup>23</sup>. Although the mechanism linking K<sup>+</sup> efflux to activation  
72 of NLRP3 is not well defined, evidence suggests that K<sup>+</sup> efflux occurs upstream of NLRP3

73 activation and may induce a conformational change in NLRP3 that favours  
74 oligomerization<sup>23,24</sup>. This raises the possibility that K<sup>+</sup> efflux pathways could be targeted to  
75 therapeutically activate, or potentiate the activation of, NLRP3 to control intracellular  
76 pathogens.

77

78 One of the master regulators of cellular K<sup>+</sup> flux is the With-No-Lysine (WNK) kinase signalling  
79 pathway. In response to cellular stress or osmotic changes, WNK kinase activates the SPAK  
80 and OXSR1 kinases. SPAK and OXSR1 inhibit the KCC channels, which pump K<sup>+</sup> out of the cell,  
81 and activate the NKCC channels, which pump K<sup>+</sup> into the cell<sup>25</sup>. It has previously been shown  
82 that blocking the interaction of SPAK/OXSR1 and KCC1 leads to net K<sup>+</sup> efflux from the cell<sup>26</sup>.

83 We have further shown that constitutively active KCC1 alters the inflammatory response to  
84 malaria infection in mice, and that this effect is associated with dramatically increased  
85 survival<sup>27</sup>. Here we sought to investigate whether the SPAK/OXSR1 pathway is involved in the  
86 host response to mycobacterial infection, and if this pathway could be manipulated as a host-  
87 directed therapy against infection.

88

## 89 **Results**

### 90 **Infection-induced activation of *oxsr1a* aids the growth of pathogenic mycobacteria.**

91 To determine if SPAK and OXSR1 are involved in immunity, we infected zebrafish embryos  
92 with *Mycobacterium marinum* and analysed gene expression at 3 days post infection (dpi).

93 Both *stk39* and *oxsr1a* (the zebrafish orthologs of *SPAK* and *OXSR1* respectively) were  
94 significantly upregulated at 3 dpi compared to uninfected embryos (Figure 1A). This result is  
95 consistent with previous data showing *oxsr1a* is upregulated in *M. marinum*-infected  
96 macrophages<sup>28</sup>.

97

98 To determine if the upregulation of *stk39* and *oxsr1a* results in increased bacterial growth,  
99 we depleted each kinase individually by CRISPR-Cas9 knockdown and infected the embryos  
100 with fluorescent *M. marinum* (Extended Data 1). *M. marinum* burden was significantly  
101 reduced in *oxsr1a*, but not *stk39*, knockdown embryos (Figures 1B and 1C). To confirm these  
102 results, we created a stable *oxsr1a* knockout allele *oxsr1a<sup>syd5</sup>* (Extended Data 2). Homozygous,  
103 but not heterozygous, *oxsr1a<sup>syd5</sup>* embryos showed reduced bacterial burden (Figure 1D).

104

### 105 **The immunomodulatory role of OXSR1 is conserved in human cells.**

106 To determine whether the immunomodulatory role of OXSR1 is conserved across species, we  
107 first differentiated human THP-1 cells with PMA and infected with *M. tuberculosis*. At 3 dpi  
108 OXSR1 protein expression was significantly upregulated in infected cells compared to  
109 uninfected cells (Figure 2A and Extended Data 3), mirroring the increased *oxsr1a* expression  
110 observed in infected zebrafish embryos. To determine whether this upregulation would affect  
111 bacterial burden, we generated an *OXSR1* knockdown human THP-1 cell line (Figures 2B and  
112 Extended Data 3).

113

114 We first differentiated these THP-1 knockdown cells with PMA and infected with *M. marinum*  
115 to determine if mycobacterial infection would induce changes in intracellular K<sup>+</sup>  
116 concentration. While we saw a small, statistically insignificant, increase in intracellular K<sup>+</sup>  
117 concentration in *M. marinum*-infected control siRNA-expressing cells, *M. marinum*-infected  
118 *OXSR1* knockdown cells had significantly reduced K<sup>+</sup> concentration compared to uninfected  
119 *OXSR1* knockdown cells (Figure 2C).

120

121 We next infected our *OXS1* knockdown THP-1 cells with *M. marinum* and *M. tuberculosis*  
122 H37Rv and quantified bacterial growth by CFU recovery. At 1 dpi, knockdown THP-1 cells had  
123 reduced intracellular *M. marinum* load compared to control THP-1 cells (Figure 2D). At 3 dpi,  
124 knockdown THP-1 cells had reduced intracellular *M. tuberculosis* load compared to WT THP-  
125 1 cells (Figure 2E).

126

127 Together these results indicate that OXS1 controls cellular potassium flux during  
128 mycobacterial infection and that the immunomodulatory role of OXS1 is conserved between  
129 zebrafish and humans.

130

### 131 **Small molecule inhibition of SPAK/OXS1 is host protective**

132 Because SPAK/OXS1-modulated K<sup>+</sup> channels also shuttle Cl<sup>-</sup>, Na<sup>2+</sup> and Ca<sup>2+</sup>, this pathway has  
133 been studied for its role in hypertension. The small molecule, Compound B (CB), reduces  
134 hypertension in animal models by inhibiting WNK phosphorylation of SPAK/OXS1<sup>29</sup>,  
135 preventing SPAK/OXS1 activation<sup>30</sup>. We first determined that 1.8 μM was the maximum dose  
136 of CB that could be tolerated by zebrafish larvae for 5 days for infection (Table 4). This  
137 concentration of CB did not affect the growth of *M. marinum* in axenic culture (Figure 3A).

138

139 Immersion of *M. marinum*-infected zebrafish embryos in 1.8 μM CB immediately after  
140 infection replicated the effect of *oxsr1a* knockdown by decreasing bacterial burden (Figure  
141 3B). Treatment of infected THP-1 cells with CB also phenocopied the effect of *OXS1*  
142 knockdown, with reduced *M. marinum* burden at 1 dpi (Figure 3C) and reduced *M.*  
143 *tuberculosis* H37Rv burden at 3 dpi compared to DMSO treatment (Figure 3D).

144

145 **The *M. marinum* ESX1 secretion system is required for infection-induced upregulation of**  
146 **host *oxsr1a*.**

147 We next examined the role of mycobacterial virulence in driving infection-induced expression  
148 of *oxsr1a* and sensitivity to Oxsr1a depletion or inhibition by infecting zebrafish embryos with  
149  $\Delta$ ESX1 *M. marinum*, which cannot escape the macrophage phagocytic vacuole and fails to  
150 activate the inflammasome<sup>31</sup>. In contrast to infections with WT *M. marinum*, we did not  
151 observe an upregulation of either kinase when zebrafish embryos were infected with  $\Delta$ ESX1  
152 *M. marinum* (Figure 4A). The burdens of zebrafish embryos infected with  $\Delta$ ESX1 *M. marinum*  
153 were insensitive *oxsr1a* knockdown (Figure 4B) or treatment with CB (Figure 4C) suggesting  
154 a potential role for inflammasome activation in the protective effects of Oxsr1a depletion or  
155 inhibition.

156

157 **Infection-induced OXSR1 suppresses inflammasome activity to aid mycobacterial infection.**

158 To determine if the reduced bacterial burden in *oxsr1a* knockdown was mediated by  
159 increased inflammasome activation, we used CRISPR to knockdown *si:zfos-364h11.1*, a  
160 zebrafish protein with orthology to mouse and rat NLRP3, hereafter referred to as *nlrp3*, and  
161 the *il1b* gene which encodes IL-1 $\beta$  (Extended Data 1). Knockdown of *nlrp3* alone did not affect  
162 the *M. marinum* burden but ameliorated the protective effect of *oxsr1a* knockdown against  
163 *M. marinum* infection (Figures 5A and 5B). The same effect was observed in zebrafish  
164 embryos subjected to *il1b* knockdown in combination with *oxsr1a* knockdown during *M.*  
165 *marinum* infection (Figure 5C).

166

167 In THP-1 cells infected with *M. tuberculosis* H37Rv, the *OXSR1* knockdown-mediated  
168 reduction in *M. tuberculosis* CFU observed at 3 dpi was ameliorated by treatment with the

169 NLRP3 inhibitor MCC950 (Figure 5D). Supernatant IL-1 $\beta$  was significantly higher in media from  
170 *OXS1* knockdown cells compared to the WT THP-1 cells after *M. tuberculosis* H37Rv infection  
171 and this increase in IL-1 $\beta$  was ablated by MCC950 treatment (Figure 5E). Together these data  
172 indicate that infection-induced increased expression of *oxsr1a* increases the mycobacterial  
173 burden through suppression of inflammasome activation.

174

175 **Infection-induced OXS1 suppresses host protective TNF- $\alpha$  and cell death early in infection.**

176 Inflammasome-mediated IL-1 $\beta$  increases the macrophage killing of mycobacteria through  
177 upregulation of TNF- $\alpha$ <sup>2</sup>. We therefore repeated our infection experiments in  
178 *TgBAC(tnfa:GFP)<sup>pd1028</sup>* embryos to determine if increased TNF- $\alpha$  production was mediating  
179 the resistance to mycobacterial infection in *oxsr1a* knockdown zebrafish. The ratio of *tnfa*  
180 promoter activity driven GFP per mycobacteria was increased specifically at sites of infection  
181 in *oxsr1a* knockdown embryos (Figure 6A) and also in Compound B-treated embryos (Figure  
182 6B). This effect was dependent on *il1b* expression as knockdown of *il1b* suppressed  
183 *TgBAC(tnfa:GFP)<sup>pd1028</sup>*-driven GFP expression around sites of infection (Figure 6C).

184

185 To determine if *tnfa* expression acts downstream of *oxsr1a* depletion, we knocked down *tnfa*  
186 expression with CRISPR-Cas9 in the *TgBAC(tnfa:GFP)<sup>pd1028</sup>* background to monitor knockdown  
187 efficacy (Figure 6D)<sup>32</sup>. Knockdown of *tnfa* reduced the amount of infection-induced *tnfa*  
188 promoter-driven GFP produced around sites of infection and ameliorated the protective  
189 effect of *oxsr1a* knockdown against *M. marinum* infection (Figure 6E). Together these data  
190 suggest increased TNF- $\alpha$  downstream of inflammasome-processed IL-1 $\beta$  is the mechanism  
191 driving the lower bacterial burden in *oxsr1a* knockdown embryos.

192



193 **Discussion**

194 Here we used the zebrafish-*M. marinum* and *in vitro* human-*M. tuberculosis* experimental  
195 systems to show that the WNK-OSXR1 signalling pathway has a critical role in infection-  
196 induced activation of the inflammasome. We present evidence that pathogenic mycobacteria  
197 increase macrophage K<sup>+</sup> concentration by inducing expression of OXSR1. Infection-induced  
198 OXSR1 suppresses protective NLRP3 inflammasome responses and downstream IL-1β/ TNF-α  
199 production. Several studies have suggested that mycobacteria modulate inflammasome  
200 activation either by active inhibition or by upregulation of NOS, IFN-β and other negative  
201 inflammasome regulators<sup>10</sup>. Our data expand this literature by showing that mycobacterial  
202 infection-induced OXSR1 expression reduces protective inflammasome activation.

203

204 In our infection model we found that WT, but not a-virulent ΔESX1, *M. marinum* induced  
205 expression of both OXSR1 and SPAK. The ESX1 secretion system is essential for the virulence  
206 of *M. marinum* and is required for escape of the mycobacteria into the cytoplasm<sup>33,34</sup>. This  
207 suggests that SPAK/OXSR1 upregulation is driven by the bacteria and fits with the well-  
208 established paradigm that pathogenic mycobacteria co-opt host pathways to establish  
209 persistent infection<sup>35-39</sup>.

210

211 We found *stk39* knockdown had no effect on host control of mycobacterial infection in  
212 zebrafish embryos. Previous studies have shown that mouse SPAK can play a role in activating  
213 macrophage inflammation in both lung injury and inflammatory bowel disease models<sup>40-42</sup>.  
214 These data raise the possibility that SPAK and OXSR1 may have species or organ specific roles  
215 in innate immunity and may respond differently to sterile and infectious triggers of  
216 inflammation.

217

218 The effect of Compound B on mycobacterial growth showed that small-molecule inhibition of  
219 OXSR1 can reproduce the impact of OXSR1 knockdown on mycobacterial survival. This  
220 observation provides proof of concept that OXSR1 may be a suitable target for host-directed  
221 therapies against mycobacterial and other intracellular infections. The reduction in bacterial  
222 burden was not as large in CB-treated fish as the reduction observed in OXSR1 knockdown  
223 embryos. This result may be because the maximum tolerated dose of CB was 1.8  $\mu\text{M}$ , which  
224 is low compared to some reported  $\text{EC}_{50}$  values<sup>30</sup>. Therefore, CB may not have reduced OXSR1  
225 activity to the same extent as in the OXSR1 knockdown embryos.

226

227 The results from the THP-1-derived macrophages confirm that the role of OXSR1 in the host  
228 response to infection is conserved across species. We showed that infection with WT *M.*  
229 *marinum* decreased the  $\text{K}^+$  content of OXSR1 knockdown cells but did not significantly affect  
230 the  $\text{K}^+$  content of WT cells. Paired with our data showing that WT *M. marinum* increases  
231 expression of *oxsr1a*, this suggests that virulent mycobacteria manipulate the SPAK/OXSR1  
232 pathway to maintain high intracellular  $\text{K}^+$ .

233

234 Several studies have shown that  $\text{K}^+$  concentration can affect mycobacterial growth and  
235 dormancy, and that successful colonisation of macrophages relies on the ability of the  
236 bacteria to maintain  $\text{K}^+$  homeostasis<sup>43-45</sup>. While here we have examined the effects of  $\text{K}^+$  efflux  
237 on inflammasome activation, it is possible that the high  $\text{K}^+$  maintained in WT cells also aids  
238 mycobacterial growth by helping the bacteria maintain the correct ion homeostasis. The  
239 mycobacterial infections in THP-1-derived macrophages revealed that both OXSR1  
240 knockdown and treatment with CB resulted in reduced growth of both *M. marinum* and *M.*

241 *tuberculosis* H37Rv in the human macrophage cell line. With *M. marinum* the maximum  
242 reduction was observed at 1 dpi, whereas with *M. tuberculosis* this was not seen until 3 days  
243 post infection. This is likely to be due to the differing replication times of both pathogens,  
244 which are 7 hours and 24 hours, respectively.

245

246 Here we have shown that OXSR1 knockdown can only reduce bacterial burden in zebrafish  
247 embryos if NLRP3, IL-1 $\beta$ , and TNF $\alpha$  are functional. In human cells we have shown that infected  
248 OXSR1 knockdown cells release significantly more IL-1 $\beta$  into the supernatant and that this is  
249 ablated by the NLRP3 inhibitor MCC950. Together this suggests that OXSR1 knockdown  
250 reduces bacterial burden via a first step of NLRP3 activation. Previous work in the zebrafish-  
251 *M. marinum* model has shown both host detrimental and host beneficial effects of  
252 inflammasome activation. While morpholino knockdown of *il1b* has been reported to  
253 increase bacterial burden, suggesting that *il1b* plays a host protective role; morpholino  
254 knockdown of *caspa* reduced bacterial burden, suggesting caspase-associated cell death of  
255 infected macrophages benefits the bacteria<sup>46</sup>. In our experiments we did not find any effect  
256 of *il1b* or *nlrp3* knockdown on bacterial burden compared to control embryos. This may have  
257 been because we were using mosaic F0 CRISPR knockout, which is not a complete removal or  
258 because of *M. marinum* strain differences between studies.

259

260 We found either CB treatment and *oxsr1a* knockdown result in localised increased TNF $\alpha$   
261 production at sites of infection. The fact that we only observed increased TNF $\alpha$  localised to  
262 sites of infection, and not throughout the whole embryo, suggests that *oxsr1a* knockdown  
263 primes cells for NLRP3 activation but does not cause excess systemic inflammation. Full  
264 activation of NLRP3 requires both a priming signal, to induce transcription of NLRP3

265 components, and pro- IL-1 $\beta$  and an activation signal, to induce oligomerization of NLRP3<sup>18,19</sup>.  
266 K<sup>+</sup> efflux should provide only the second signal<sup>18,23</sup>; therefore in cells which have not been  
267 primed by infection with bacteria we would not expect to see significant NLRP3 activation.  
268 This suggests that OXSR1 inhibition may be an effective host-directed therapy strategy that  
269 induces beneficial inflammation at sites of infection without inducing detrimental systemic  
270 inflammation.

271

272 Our findings that OXSR1 can be targeted to decrease bacterial burden define a new avenue  
273 for the development of host-directed therapy. Although numerous studies have investigated  
274 the potential of inhibiting NLRP3 to minimize pathology<sup>47</sup>, the possibility of activating  
275 inflammasomes to increase pathogen clearance has been largely unexplored. Here we have  
276 shown that enhancing inflammasome activation via K<sup>+</sup> efflux can provide the dual benefits of  
277 maximising the anti-pathogen effects of inflammation without causing excess tissue damage.  
278 Given mycobacteria are not the only pathogens which inhibit inflammasome activation,  
279 OXSR1 inhibition may be an effective host-directed therapy with broad applicability.

280

281

## 282 **Methods**

### 283 *Zebrafish husbandry*

284 Adult zebrafish were housed at the Centenary Institute (Sydney Local Health District AWC  
285 Approval 2017-036). Zebrafish embryos were obtained by natural spawning and embryos  
286 were raised at 28°C in E3 media.

287

### 288 *Zebrafish lines*

289 Wild type zebrafish are the TAB background. Transgenic line was *Tg(tnfa:GFP)<sup>pd1028</sup>*<sup>48</sup>.

290

### 291 *Infection of zebrafish embryos*

292 Embryos were infected by microinjection with ~400 fluorescent *M. marinum* M strain and  
293  $\Delta$ ESX1 *M. marinum* as previously described<sup>49</sup>. Embryos were recovered into E3 supplemented  
294 with 0.036 g/L PTU, housed at 28 °C and imaged on day 5 of infection unless otherwise stated.

295

### 296 *Quantitative Reverse Transcription PCR (qRT-PCR)*

297 RNA was extracted from 5-10 embryos using TRIzol (Invitrogen) according to the  
298 manufacturer's instructions. Equal amounts of RNA (either 1 or 2  $\mu$ g depending on RNA yield)  
299 were used for the cDNA synthesis reaction. qRT-PCR reactions were carried out on a Biorad  
300 CFX machine using ThermoFisher PowerUP SYBR green and primers described in Table 1. The  
301 relative quantity of transcripts was calculated by the Delta-delta CT method.

302

### 303 *Imaging*

304 Live zebrafish embryos were anaesthetized in M-222 (Tricaine) and mounted in 3%  
305 methylcellulose for static imaging on a Leica M205FA fluorescence stereomicroscope.  
306 Fluorescent pixel count analyses were carried out with Image J Software Version 1.51j and  
307 intensity measurements were performed as previously described<sup>49</sup>.

308

### 309 *CRISPR-Cas9 knockdown and mutant generation*

310 Primers used for gRNA transcription are detailed in Table 2 and were designed by Wu et al.  
311 <sup>50</sup>. Templates for gRNA transcription were produced by annealing and amplifying gene specific

312 oligos to the scaffold oligo using the NEB Q5 polymerase. Pooled transcription of gRNAs was  
313 carried out using the NEB HiScribe T7 High Yield RNA Synthesis Kit.

314

315 Embryos were injected at the single cell stage with an injection mix containing 1  $\mu$ l phenol  
316 red, 2  $\mu$ l 500 ng/ $\mu$ l pooled guides, and 2  $\mu$ l of 10  $\mu$ M Cas9. All 'Scram' embryos are injected  
317 with scrambled guide RNA.

318

319 To create *oxsr1a* knockout line, F0 crispants were outcrossed to WT AB, and HRM analysis  
320 was conducted on F1 progeny. F1s with a visible HRM shift using primers amplifying the 4  
321 predicted cut sites (primer 3 spanned 2 cut sites) were sent for sanger sequencing. An F1 was  
322 discovered carrying an 8 bp deletion causing a premature stop at amino acid 13 (Extended  
323 Data 2). F2 progeny were genotyped with a custom KASP assay ordered from LGC Biosearch  
324 Technologies.

325

### 326 *Drug treatments*

327 Embryos and cells were treated with vehicle control (DMSO or water as appropriate), 10  $\mu$ M  
328 MCC950, 77  $\mu$ M Ac-YVAD-cmk, 1.8  $\mu$ M Compound B, or 48  $\mu$ M Furosemide (Sigma)  
329 immediately after infection. For zebrafish, the drugs and E3 were replaced on days 0, 2, and  
330 4 dpi. For cell culture, drugs were replaced at 4 hours post infection.

331

### 332 *Axenic culture*

333 A mid-log culture of fluorescent *M. marinum* was diluted 1:100 and aliquoted into 96 well  
334 plates for drug treatment. Cultures were maintained at 28°C in a static incubator and bacterial  
335 fluorescence was measured in a BMG Fluorostar plate reader.

336

337 *THP-1 cell culture*

338 Human THP-1 cells (ATCC® TIB-202™) were cultured in RPMI media (22400089, ThermoFisher)  
339 supplemented with 1% (v/v) non-essential amino acids (11140050, ThermoFisher), 1 mM  
340 sodium pyruvate (11360070, ThermoFisher), 10% (v/v) FCS (Hyclone, GE Healthcare) and 0.1  
341 mg/ml penicillin/streptomycin (15140122, ThermoFisher) at 37°C, 5% CO<sub>2</sub>.

342

343 *Viral production*

344 24 hours prior to transfection, 4x10<sup>6</sup> HEK2937 cells were seeded in a 100 mm culture dish. On  
345 the day of transfection, cells were co-transfected with 15ug of the pLKO.1\_GFP (#30323,  
346 Addgene) vector containing OXSR1\_Sh1, OXSR1\_Sh2 or AthmiR, 6.5 µg of the packaging  
347 plasmid pMDL-g/prre (#12251, Addgene), 2.5 µg of the packaging plasmid pRSV-Rev (#12253,  
348 Addgene) and 3.5 µg of the envelop expressing plasmid pMD2-VSV-G (#12259, Addgene) by  
349 the calcium phosphate transfection method. Culture media was changed the following day  
350 and cells were cultured for another 24 hours. Medium containing lentiviral particles was then  
351 collected, debris was cleared by centrifugation at 430 g for 5 minutes, filtered through a 0.45  
352 µm filter, aliquoted, and stored at -80°C.

353

354 *Transduction*

355 Briefly, 5x10<sup>5</sup> THP-1 cells were resuspended in 500 µl of fresh culture media containing 10  
356 µg/ml polybrene. After adding 50 µl of virus, cells were spinoculated for 90 min at 462 g, 22°C.  
357 After spinning, pelleted cells were resuspended in in the same media and incubated for 4  
358 hours at 37C, 5%CO<sub>2</sub>. Following incubation, cells were pelleted, resuspended in fresh culture

359 media and transferred to a 6 well plate. Cells were cultured for 48 hours before FACS  
360 selection.

361

### 362 *Western Blotting*

363 Protein lysates were loaded onto 4-12% BIS-Tris Protein gels (NP0336BOX, ThermoFisher) for  
364 electrophoresis followed by transfer onto a PVDF membrane (MILIPVH00010, Merck  
365 Millipore). Membrane was blocked with 5% (v/v) skim milk for 1 hour at room temperature,  
366 incubated overnight with a 1:1000 dilution of rabbit anti-OXSR1 (ab97694, Abcam) followed  
367 by incubation with a 1:5000 dilution of a donkey anti-rabbit IgG HRP antibody (AP182P, Merck  
368 Millipore) and 1:5000 dilution of mouse anti-GAPDH (ab8245, Abcam) antibody, followed by  
369 incubation with a 1:5000 dilution of a donkey anti-mouse IgG HRP antibody (AP192P, Merck  
370 Millipore). Protein detection was performed using SuperSignal West Pico PLUS (34579,  
371 ThermoFisher) and imaged on a Bio-Rad ChemiDoc Imaging System.

372

### 373 *ION K+ Green (undifferentiated cells)*

374 For flow cytometry,  $2 \times 10^5$  undifferentiated THP-1 cells/well (ATCC<sup>®</sup> TIB-202<sup>™</sup>) were seeded  
375 into a 96 well plate and incubated at 37°C for 1.5-2 hrs with either Furosemide, 37.5 mM or  
376 75 mM KCl. ION K+ Green was added to a final concentration of 52.8 mM and cells were  
377 incubated for a further 15 minutes. Cells were spun down for 5 minutes at 462 g and  
378 resuspended in PBS + 2% FCS supplemented with either Furosemide, 37.5 mM or 75 mM KCl.  
379 ION K+ Green fluorescence was captured on a BD Fortessa through the PE channel. 5000  
380 events were captured per sample.

381

### 382 *ION K+ Green (differentiated cells)*



383 2x10<sup>5</sup> THP-1 cells/well were seeded into a 96 well plate and differentiated for 24 hrs with 100  
384 mM PMA. Cells were then infected with frozen single cell preparation *M. marinum*-katushka  
385 at an MOI of 1. After 4 hrs extracellular bacteria were removed by washing with PBS + 2% FCS,  
386 and cells were incubated at 32°C for 3 days. Cells were lifted from the plate by 15 minute  
387 incubation at 37°C with Accutase™ (StemCell Technologies), then washed with PBS + 2% FCS.  
388 ION K+ Green was added to a final concentration of 52.8 mM and cells were incubated for a  
389 further 15 minutes. Cells were spun down for 5 minutes at 462 g and resuspended in PBS +  
390 2% FCS for flow cytometry. ION K+ Green fluorescence was captured on a BD Fortessa through  
391 the FITC channel (so as not to overlap with katushka). 5000 events were captured per sample.  
392

393 For static imaging, THP-1 cells were seeded onto an imaging slide coated with 1% low melting  
394 point agarose and differentiated for 24 hrs with 100 mM PMA. ION K+ Green was added to a  
395 final concentration of 52.8 mM and cells were incubated for 15 minutes at 37°C. Culture  
396 media was replaced with PBS + 2% FCS. Cells were imaged on a Leica Sp8 and mean ION K+  
397 Green fluorescence was analysed using the 'measure' function in Image J.  
398

#### 399 *Mycobacterial infection of THP-1 cells*

400 2x10<sup>5</sup> THP-1 cells/well were seeded into a 96 well plate and differentiated for 24 hrs with 100  
401 mM PMA. Cells were then infected with either mid log culture of *M. tuberculosis* H37Rv or  
402 frozen single cell preparation of *M. marinum* at an MOI of 1. After 4 hrs, extracellular bacteria  
403 were removed by washing with PBS + 2% FCS, and cells were incubated at either 32°C for *M.*  
404 *marinum* infections or 37°C for *M. tuberculosis* infections.

405

#### 406 *Mycobacterial CFU recovery from THP-1 cells*

407 Cells were washed in PBS + 2% FCS and lysed with TDW + 1% Triton X100 for 10 minutes.  
408 lysate was serially diluted and plated on 7H10 agar supplemented with 50 µg/ml hygromycin  
409 for the recovery of *M. marinum* or a mix of 200,000 units/L polymyxin B, 50mg/L carbenicillin,  
410 10mg/L amphotericin B, and 20mg/L trimethoprim lactate for the recovery of *M. tuberculosis*.  
411 Plates were incubated at 32°C for 7 days (*M. marinum*) or 37°C for 14 days (*M. tuberculosis*).

412

#### 413 *Measurement of human IL-1β in supernatants*

414 IL-1β was measured by cytometric bead array, using a human IL-1β enhanced-sensitivity flex  
415 set (BD Biosciences). Undiluted cell supernatant was stained according to the manufacturer's  
416 instructions and run on a BD FACS Canto II. Data was analysed using FCAP array software.

417

#### 418 *Statistics*

419 All statistical tests were calculated in Graphpad Prism. T-tests were unpaired t-tests with  
420 Welch's correction. All ANOVA were ordinary one-way ANOVA, comparing the means of  
421 specified pairings, using Turkey's multiple comparisons test with a single pooled variance. In  
422 cases where data was pooled from multiple experiments, data from each was normalized to  
423 its own within-experiment control (usually DMSO) before pooling. Error bars indicate SEM.  
424 Outliers were removed using ROUT, with Q=1%.

425

#### 426 **Funding**

427 This work was supported by the Australian National Health and Medical Research Council  
428 [grant numbers APP1099912, APP1053407 to S.H.O.; APP1153493 to W.J.B.]; University of  
429 Sydney Fellowship [grant number G197581 to S.H.O.]; NSW Ministry of Health under the NSW  
430 Health Early-Mid Career Fellowships Scheme [grant number H18/31086 to S.H.O.]; the

431 Kenyon Family Inflammation Award [2019 to E.H.] and the Centenary Institute Booster Grant  
432 [2020 to E.H.].

433

#### 434 **Acknowledgements**

435 We thank Dr Kristina Jahn of Sydney Cytometry for assistance with imaging equipment; Ms  
436 Kaiming Luo and Dr Pradeep Cholan for technical assistance, and all members of the  
437 Tuberculosis Research Program at the Centenary Institute for helpful comments.

438

#### 439 **Author contributions**

440 E.H. and S.H.O designed the experiments. E.H., V.L.T, S.H.O. performed the experiments.  
441 A.R.M.F. performed microscopy. N.P. and J.J-L.W. generated knockdown cell lines. E.H. and  
442 S.O. wrote the paper that was reviewed by all authors. W.J.B., and S.H.O. supervised the  
443 project.

444

#### 445 **Declaration of Interests**

446 The authors declare no competing interests.

447

#### 448 **References**

- 449 1 Wawrocki, S. & Druszczynska, M. Inflammasomes in Mycobacterium tuberculosis-  
450 Driven Immunity. *Can J Infect Dis Med Microbiol* **2017**, 2309478,  
451 doi:10.1155/2017/2309478 (2017).
- 452 2 Jayaraman, P. *et al.* IL-1beta promotes antimicrobial immunity in macrophages by  
453 regulating TNFR signaling and caspase-3 activation. *J Immunol* **190**, 4196-4204,  
454 doi:10.4049/jimmunol.1202688 (2013).
- 455 3 Taxman, D. J., Huang, M. T. & Ting, J. P. Inflammasome inhibition as a pathogenic  
456 stealth mechanism. *Cell Host Microbe* **8**, 7-11, doi:10.1016/j.chom.2010.06.005  
457 (2010).
- 458 4 Lu, A. & Wu, H. Structural mechanisms of inflammasome assembly. *FEBS J* **282**, 435-  
459 444, doi:10.1111/febs.13133 (2015).

- 460 5 Master, S. S. *et al.* Mycobacterium tuberculosis prevents inflammasome activation.  
461 *Cell Host Microbe* **3**, 224-232, doi:10.1016/j.chom.2008.03.003 (2008).
- 462 6 Sousa, J. *et al.* Mycobacterium tuberculosis associated with severe tuberculosis  
463 evades cytosolic surveillance systems and modulates IL-1beta production. *Nat*  
464 *Commun* **11**, 1949, doi:10.1038/s41467-020-15832-6 (2020).
- 465 7 Koo, I. C. *et al.* ESX-1-dependent cytolysis in lysosome secretion and inflammasome  
466 activation during mycobacterial infection. *Cell Microbiol* **10**, 1866-1878,  
467 doi:10.1111/j.1462-5822.2008.01177.x (2008).
- 468 8 Kurenuma, T. *et al.* The RD1 locus in the Mycobacterium tuberculosis genome  
469 contributes to activation of caspase-1 via induction of potassium ion efflux in infected  
470 macrophages. *Infect Immun* **77**, 3992-4001, doi:10.1128/IAI.00015-09 (2009).
- 471 9 Dorhoi, A. *et al.* Activation of the NLRP3 inflammasome by Mycobacterium  
472 tuberculosis is uncoupled from susceptibility to active tuberculosis. *Eur J Immunol* **42**,  
473 374-384, doi:10.1002/eji.201141548 (2012).
- 474 10 Briken, V., Ahlbrand, S. E. & Shah, S. Mycobacterium tuberculosis and the host cell  
475 inflammasome: a complex relationship. *Front Cell Infect Microbiol* **3**, 62,  
476 doi:10.3389/fcimb.2013.00062 (2013).
- 477 11 Carlsson, F. *et al.* Host-detrimental role of Esx-1-mediated inflammasome activation  
478 in mycobacterial infection. *PLoS Pathog* **6**, e1000895,  
479 doi:10.1371/journal.ppat.1000895 (2010).
- 480 12 Mishra, B. B. *et al.* Nitric oxide controls the immunopathology of tuberculosis by  
481 inhibiting NLRP3 inflammasome-dependent processing of IL-1beta. *Nat Immunol* **14**,  
482 52-60, doi:10.1038/ni.2474 (2013).
- 483 13 Li, Q. *et al.* Heme induces IL-1beta secretion through activating NLRP3 in kidney  
484 inflammation. *Cell Biochem Biophys* **69**, 495-502, doi:10.1007/s12013-014-9823-9  
485 (2014).
- 486 14 Erdei, J. *et al.* Induction of NLRP3 Inflammasome Activation by Heme in Human  
487 Endothelial Cells. *Oxid Med Cell Longev* **2018**, 4310816, doi:10.1155/2018/4310816  
488 (2018).
- 489 15 Greaney, A. J., Leppla, S. H. & Moayeri, M. Bacterial Exotoxins and the Inflammasome.  
490 *Frontiers in immunology* **6**, 570, doi:10.3389/fimmu.2015.00570 (2015).
- 491 16 Eigenbrod, T. & Dalpke, A. H. Bacterial RNA: An Underestimated Stimulus for Innate  
492 Immune Responses. *J Immunol* **195**, 411-418, doi:10.4049/jimmunol.1500530 (2015).
- 493 17 Gupta, R. *et al.* RNA and beta-hemolysin of group B Streptococcus induce interleukin-  
494 1beta (IL-1beta) by activating NLRP3 inflammasomes in mouse macrophages. *J Biol*  
495 *Chem* **289**, 13701-13705, doi:10.1074/jbc.C114.548982 (2014).
- 496 18 Kelley, N., Jeltama, D., Duan, Y. & He, Y. The NLRP3 Inflammasome: An Overview of  
497 Mechanisms of Activation and Regulation. *Int J Mol Sci* **20**, doi:10.3390/ijms20133328  
498 (2019).
- 499 19 He, Y., Hara, H. & Nunez, G. Mechanism and Regulation of NLRP3 Inflammasome  
500 Activation. *Trends Biochem Sci* **41**, 1012-1021, doi:10.1016/j.tibs.2016.09.002 (2016).
- 501 20 Perregaux, D. & Gabel, C. A. Interleukin-1 beta maturation and release in response to  
502 ATP and nigericin. Evidence that potassium depletion mediated by these agents is a  
503 necessary and common feature of their activity. *J Biol Chem* **269**, 15195-15203 (1994).
- 504 21 Petrilli, V. *et al.* Activation of the NALP3 inflammasome is triggered by low intracellular  
505 potassium concentration. *Cell Death Differ* **14**, 1583-1589,  
506 doi:10.1038/sj.cdd.4402195 (2007).

- 507 22 Franchi, L., Kanneganti, T. D., Dubyak, G. R. & Nunez, G. Differential requirement of  
508 P2X7 receptor and intracellular K<sup>+</sup> for caspase-1 activation induced by intracellular  
509 and extracellular bacteria. *J Biol Chem* **282**, 18810-18818,  
510 doi:10.1074/jbc.M610762200 (2007).
- 511 23 Munoz-Planillo, R. *et al.* K(+) efflux is the common trigger of NLRP3 inflammasome  
512 activation by bacterial toxins and particulate matter. *Immunity* **38**, 1142-1153,  
513 doi:10.1016/j.immuni.2013.05.016 (2013).
- 514 24 Meng, G., Zhang, F., Fuss, I., Kitani, A. & Strober, W. A mutation in the Nlrp3 gene  
515 causing inflammasome hyperactivation potentiates Th17 cell-dominant immune  
516 responses. *Immunity* **30**, 860-874, doi:10.1016/j.immuni.2009.04.012 (2009).
- 517 25 Gagnon, K. B. & Delpire, E. Molecular physiology of SPAK and OSR1: two Ste20-related  
518 protein kinases regulating ion transport. *Physiol Rev* **92**, 1577-1617,  
519 doi:10.1152/physrev.00009.2012 (2012).
- 520 26 Brown, F. C. *et al.* Activation of the erythroid K-Cl cotransporter Kcc1 enhances sickle  
521 cell disease pathology in a humanized mouse model. *Blood* **126**, 2863-2870,  
522 doi:10.1182/blood-2014-10-609362 (2015).
- 523 27 Hortle, E. *et al.* KCC1 Activation protects Mice from the Development of Experimental  
524 Cerebral Malaria. *Scientific reports* **9**, 6356, doi:10.1038/s41598-019-42782-x (2019).
- 525 28 Rougeot, J. *et al.* Corrigendum: RNAseq Profiling of Leukocyte Populations in Zebrafish  
526 Larvae Reveals a cxcl11 Chemokine Gene as a Marker of Macrophage Polarization  
527 During Mycobacterial Infection. *Frontiers in immunology* **10**, 2720,  
528 doi:10.3389/fimmu.2019.02720 (2019).
- 529 29 Ishigami-Yuasa, M. *et al.* Development of WNK signaling inhibitors as a new class of  
530 antihypertensive drugs. *Bioorg Med Chem* **25**, 3845-3852,  
531 doi:10.1016/j.bmc.2017.05.034 (2017).
- 532 30 Mori, T. *et al.* Chemical library screening for WNK signalling inhibitors using  
533 fluorescence correlation spectroscopy. *Biochem J* **455**, 339-345,  
534 doi:10.1042/BJ20130597 (2013).
- 535 31 Smith, J. *et al.* Evidence for pore formation in host cell membranes by ESX-1-secreted  
536 ESAT-6 and its role in Mycobacterium marinum escape from the vacuole. *Infect Immun*  
537 **76**, 5478-5487, doi:10.1128/IAI.00614-08 (2008).
- 538 32 Hortle, E. *et al.* Rough and smooth variant Mycobacterium abscessus infections are  
539 differentially controlled by host immunity during chronic infection of adult zebrafish.  
540 *Nat Commun*, doi: <https://doi.org/10.1101/856948> (2021).
- 541 33 Conrad, W. H. *et al.* Mycobacterial ESX-1 secretion system mediates host cell lysis  
542 through bacterium contact-dependent gross membrane disruptions. *Proc Natl Acad*  
543 *Sci U S A* **114**, 1371-1376, doi:10.1073/pnas.1620133114 (2017).
- 544 34 Lienard, J. *et al.* The Mycobacterium marinum ESX-1 system mediates phagosomal  
545 permeabilization and type I interferon production via separable mechanisms. *Proc*  
546 *Natl Acad Sci U S A* **117**, 1160-1166, doi:10.1073/pnas.1911646117 (2020).
- 547 35 Hortle, E. *et al.* Thrombocyte inhibition restores protective immunity to mycobacterial  
548 infection in zebrafish. *J Infect Dis*, doi:10.1093/infdis/jiz110 (2019).
- 549 36 Oehlers, S. H. *et al.* Infection-induced vascular permeability aids mycobacterial  
550 growth. *J Infect Dis* **215**, 813-817, doi:10.1093/infdis/jiw355 (2017).
- 551 37 Oehlers, S. H. *et al.* Interception of host angiogenic signalling limits mycobacterial  
552 growth. *Nature* **517**, 612-615, doi:10.1038/nature13967 (2015).

- 553 38 Johansen, M. D. *et al.* Mycobacterium marinum infection drives foam cell  
554 differentiation in zebrafish infection models. *Dev Comp Immunol* **88**, 169-172,  
555 doi:10.1016/j.dci.2018.07.022 (2018).
- 556 39 Hortle, E. & Oehlers, S. H. Host-directed therapies targeting the tuberculosis  
557 granuloma stroma. *Pathogens and disease* **78**, doi:10.1093/femspd/ftaa015 (2020).
- 558 40 Hung, C. M., Peng, C. K., Yang, S. S., Shui, H. A. & Huang, K. L. WNK4-SPAK modulates  
559 lipopolysaccharide-induced macrophage activation. *Biochem Pharmacol* **171**, 113738,  
560 doi:10.1016/j.bcp.2019.113738 (2020).
- 561 41 Yan, Y. *et al.* Overexpression of Ste20-related proline/alanine-rich kinase exacerbates  
562 experimental colitis in mice. *J Immunol* **187**, 1496-1505,  
563 doi:10.4049/jimmunol.1002910 (2011).
- 564 42 Zhang, Y. *et al.* Knockout of Ste20-like proline/alanine-rich kinase (SPAK) attenuates  
565 intestinal inflammation in mice. *Am J Pathol* **182**, 1617-1628,  
566 doi:10.1016/j.ajpath.2013.01.028 (2013).
- 567 43 Steel, H. C., Matlola, N. M. & Anderson, R. Inhibition of potassium transport and  
568 growth of mycobacteria exposed to clofazimine and B669 is associated with a calcium-  
569 independent increase in microbial phospholipase A2 activity. *The Journal of*  
570 *antimicrobial chemotherapy* **44**, 209-216, doi:10.1093/jac/44.2.209 (1999).
- 571 44 MacGilvary, N. J., Kevorkian, Y. L. & Tan, S. Potassium response and homeostasis in  
572 Mycobacterium tuberculosis modulates environmental adaptation and is important  
573 for host colonization. *PLoS Pathog* **15**, e1007591, doi:10.1371/journal.ppat.1007591  
574 (2019).
- 575 45 Salina, E. G. *et al.* Potassium availability triggers Mycobacterium tuberculosis  
576 transition to, and resuscitation from, non-culturable (dormant) states. *Open Biol* **4**,  
577 doi:10.1098/rsob.140106 (2014).
- 578 46 Varela, M., van der Vaart, M., Groenewoud, A. & Meijer, A. H. Extracellular  
579 mycobacterial DNA drives disease progression by triggering Caspase-11-dependent  
580 pyroptosis of infected macrophages. *bioRxiv*, 514125, doi:10.1101/514125 (2019).
- 581 47 Yang, Y., Wang, H., Kouadir, M., Song, H. & Shi, F. Recent advances in the mechanisms  
582 of NLRP3 inflammasome activation and its inhibitors. *Cell Death Dis* **10**, 128,  
583 doi:10.1038/s41419-019-1413-8 (2019).
- 584 48 Marjoram, L. *et al.* Epigenetic control of intestinal barrier function and inflammation  
585 in zebrafish. *Proc Natl Acad Sci U S A* **112**, 2770-2775, doi:10.1073/pnas.1424089112  
586 (2015).
- 587 49 Matty, M. A., Oehlers, S. H. & Tobin, D. M. Live Imaging of Host-Pathogen Interactions  
588 in Zebrafish Larvae. *Methods Mol Biol* **1451**, 207-223, doi:10.1007/978-1-4939-3771-  
589 4\_14 (2016).
- 590 50 Wu, R. S. *et al.* A Rapid Method for Directed Gene Knockout for Screening in GO  
591 Zebrafish. *Dev Cell* **46**, 112-125 e114, doi:10.1016/j.devcel.2018.06.003 (2018).

592

593

594 **Figures**

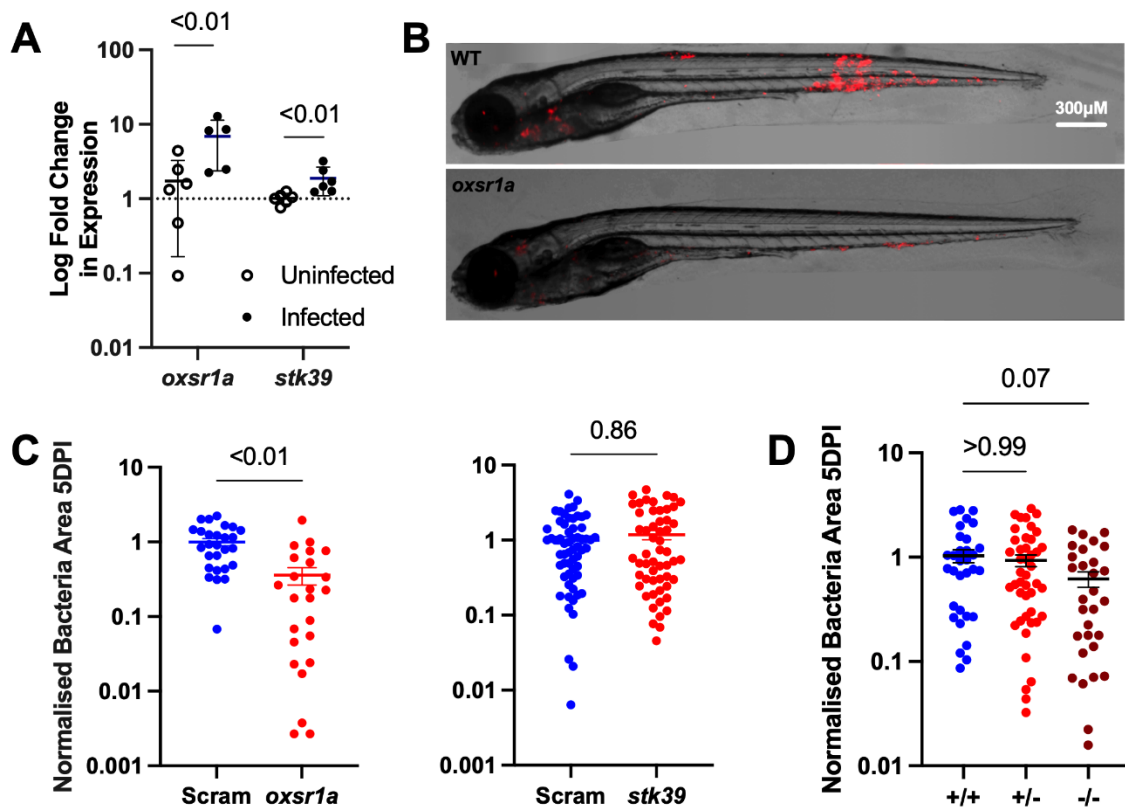

595

596 **Figure 1: Infection-induced OXS1 aids the growth of *M. marinum* in zebrafish.**

597 A) Relative expression of *oxsr1a* and *stk39* in 3 dpi *M. marinum*-infected zebrafish embryos,  
598 compared to matched uninfected controls. Biological replicates (n=6) each represent pooled  
599 RNA from 7-10 embryos. B) Representative images of *M. marinum*-tdTomato (red) bacterial  
600 burden in scramble control and mosaic F0 *oxsr1a* crispant embryos. C) Quantification of *M.*  
601 *marinum* bacterial burden in scramble control, mosaic F0 *oxsr1a* and *stk39* crispant embryos.  
602 Each graph shows combined results of two independent experiments. D) Quantification of *M.*  
603 *marinum* bacterial burden in WT, heterozygous and homozygous *oxsr1a* knockout embryos.  
604 Graph shows combined results of two independent experiments.

605

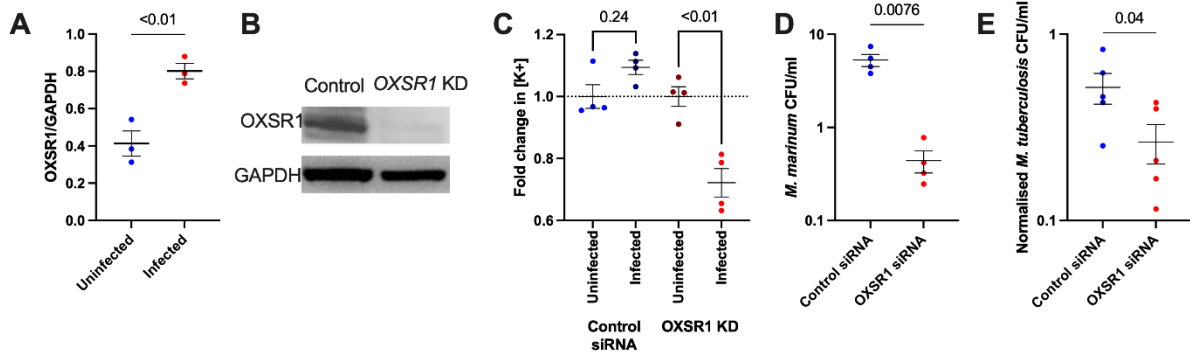

606

607 **Figure 2: OXSR1 aids the growth of *M. tuberculosis* in human THP-1 cells.**

608 A) Quantification of OXSR1 protein in *M. tuberculosis*-infected PMA-differentiated THP-1  
 609 cells. Blots are included in Extended data 3. B) Western blot of OXSR1 knockdown and vector  
 610 control THP-1 cell lines, showing loss of OXSR1. Full un-edited blots are included in Extended  
 611 data 3. C) Fold change of ION K+ green mean fluorescence intensity (measured by flow  
 612 cytometry) of *M. marinum* infected control and OXSR1 knockdown THP-1 cells. Fold change  
 613 was calculated by dividing the MFI of cells positive for *M. marinum*-Katushka by the MFI of  
 614 cells from the uninfected group. D) Quantification of intracellular *M. marinum* burden in 1  
 615 dpi OXSR1 knockdown PMA-differentiated THP-1 cells. E) Quantification of intracellular *M.*  
 616 *tuberculosis* burden in 3 dpi OXSR1 knockdown PMA-differentiated THP-1 cells.

617

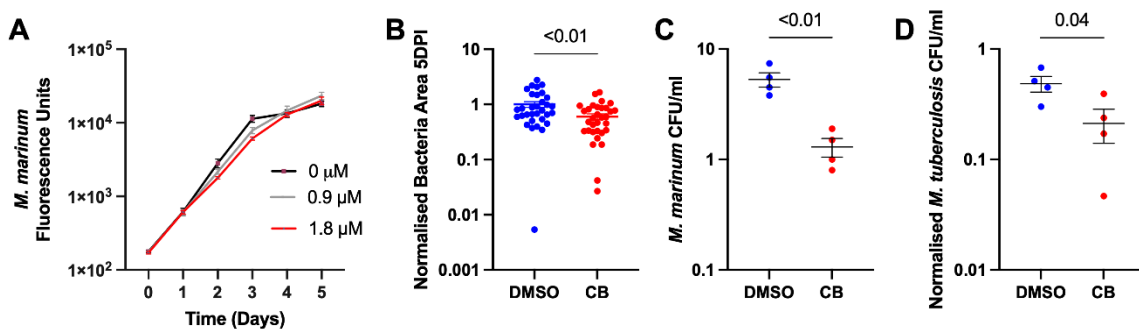

618

619 **Figure 3: Compound B inhibition of SPAK/OXSR1 reduces mycobacterial burden in zebrafish**  
 620 **embryos and human THP-1 cells.**



621 A) Quantification of axenic *M. marinum*-tdTomato growth by fluorescence in 7H9 broth  
622 culture supplemented with Compound B (CB). Red line (1.8  $\mu$ M) indicates the concentration  
623 used to treat infected embryos. B) Quantification of *M. marinum* bacterial burden in CB-  
624 treated zebrafish embryos. C) Quantification of intracellular *M. marinum* burden in 1 dpi CB-  
625 treated PMA-differentiated THP-1 cells. D) Quantification of intracellular *M. tuberculosis*  
626 burden in 3 dpi CB-treated PMA-differentiated THP-1 cells.  
627

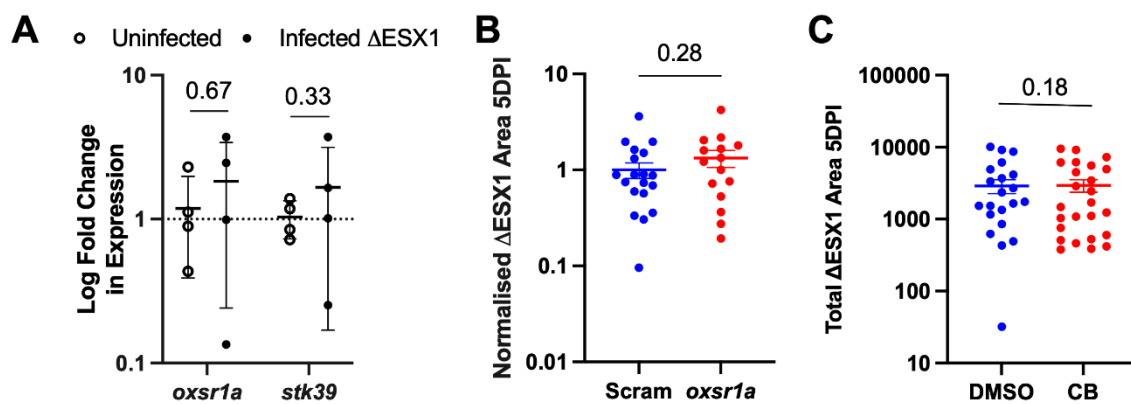

628

629 **Figure 4: *M. marinum* ESX1 drives infection-induced *oxsr1a* expression**

630 A) Relative expression of *oxsr1a* and *stk39* in zebrafish embryos at 3 days post infection with  
631  $\Delta$ ESX1-*M. marinum* compared to age-matched uninfected controls. Biological replicates (n=4)  
632 represent pooled RNA from 7-10 embryos. B) Quantification of  $\Delta$ ESX1-*M. marinum* bacterial  
633 burden in scramble control and mosaic F0 *oxsr1a* CRISPR embryos. C) Quantification of  $\Delta$ ESX1-  
634 *M. marinum* bacterial burden in DMSO vehicle control and Compound B-treated embryos.  
635

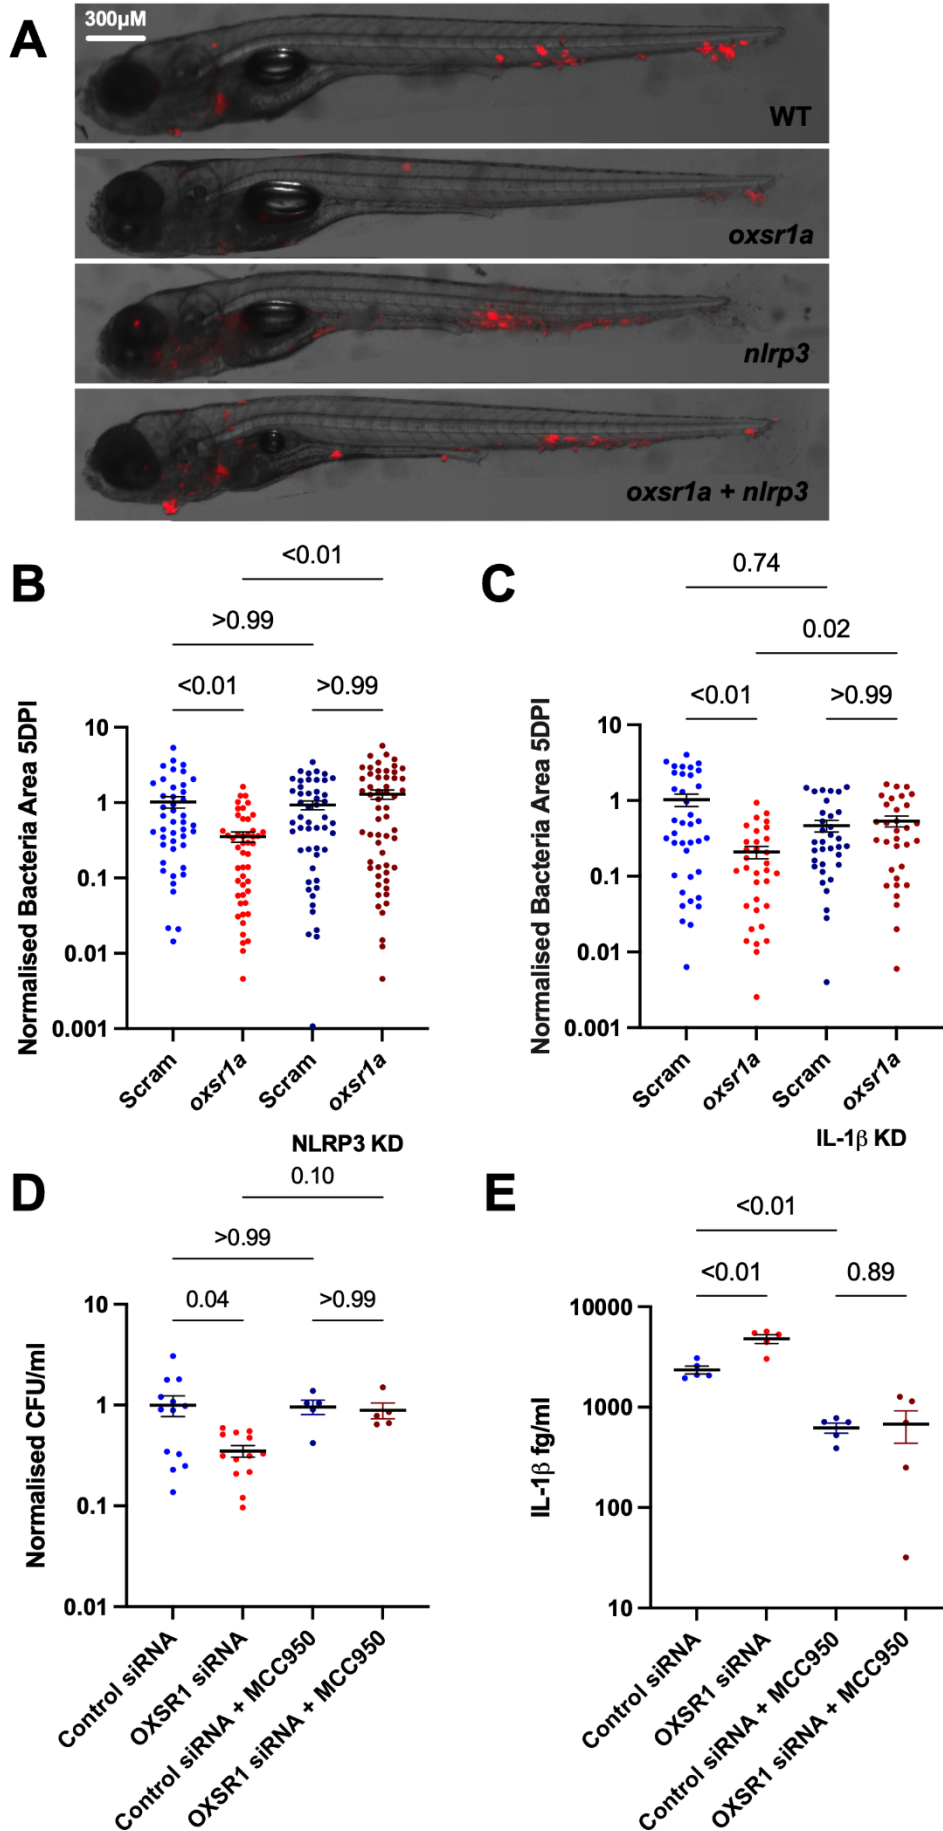

637 **Figure 5: Infection-induced OXSR1 suppresses inflammasome activity to aid mycobacterial**  
 638 **infection.**

639 A) Representative images of *M. marinum*-tdTomato (red) bacterial burden in 5 dpi WT, mosaic  
 640 F0 *oxsr1a*, *nlrp3*, and dual *oxsr1a nlrp3* crispant embryos. Scale bar represents 300  $\mu$ m. B)  
 641 Quantification of *M. marinum* bacterial burden in scramble control, mosaic F0 *oxsr1a*, *nlrp3*,  
 642 and dual *oxsr1a nlrp3* crispant embryos. Combined results of 3 biological replicates. C)  
 643 Quantification of *M. marinum* bacterial burden in scramble control, mosaic F0 *oxsr1a*, *Il1b*,  
 644 and dual *oxsr1a Il1b* crispant embryos. Combined results of 2 biological replicates. D)  
 645 Quantification of intracellular *M. tuberculosis* bacterial burden in 3 dpi OXSR1 knockdown  
 646 PMA-differentiated THP-1 cells. E) IL-1 $\beta$  content in the supernatant of 3 dpi *M. tuberculosis*-  
 647 infected OXSR1 knockdown PMA-differentiated THP-1 cells.

648

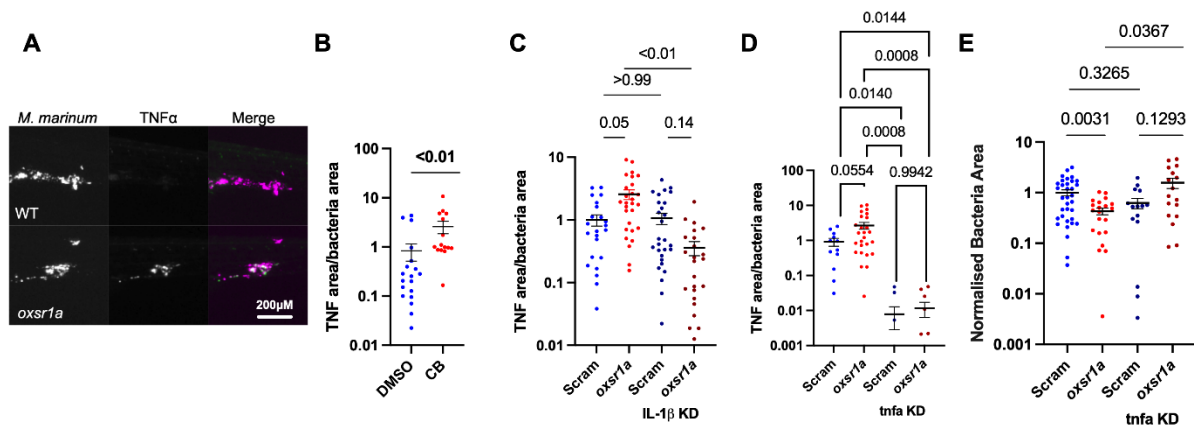

649

650 **Figure 6: Infection-induced OXSR1 suppresses inflammasome activity to aid mycobacterial**  
 651 **infection.**

652 A) Representative images of *Tg(tnfa:GFP)<sup>pd1028</sup>* fluorescence around *M. marinum*  
 653 granulomas. Scale bar represents 200  $\mu$ m. B) Quantification of *Tg(tnfa:GFP)<sup>pd1028</sup>*  
 654 fluorescent pixels per bacterial pixel in *M. marinum*-infected CB-treated zebrafish  
 655 embryos. C) Quantification of *Tg(tnfa:GFP)<sup>pd1028</sup>* fluorescent pixels per bacterial pixel

656 in *M. marinum*-infected WT, mosaic F0 *oxsr1a*, *Il1b*, and dual *oxsr1a Il1b* crispant  
657 embryos. Combined results of 2 independent experiments. D) Quantification of  
658 *Tg(tnfa:GFP)<sup>pd1028</sup>* fluorescent pixels per bacterial pixel in *M. marinum*-infected WT,  
659 mosaic F0 *oxsr1a*, *tnfa*, and dual *oxsr1a tnfa* crispant embryos. Combined results of 2  
660 independent experiments. E) Quantification of *M. marinum* burden in WT, mosaic F0  
661 *oxsr1a*, *tnfa*, and dual *oxsr1a tnfa* crispant embryos. Combined results of 2 independent  
662 experiments.

663 B)

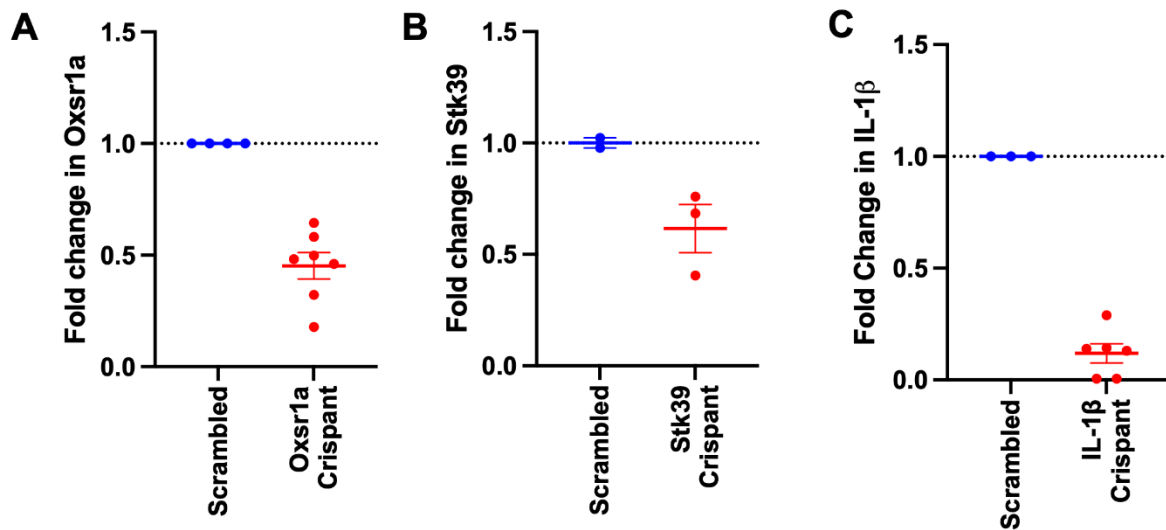

664

#### 665 Extended Data 1

666 Knockdown efficacy for CRISPR-Cas9 depletion of A) *oxsr1a*, B) *stk39*, C) *il1b*, in zebrafish  
667 embryos.

668

**A**

```

GTTGGCA AAGTTTGGCTGTTGGGACTGAGAGCGGTCGGTGAGATCAGCAC
AAGTAAATCGAGTATAAATACAGATCGGTCGTTTTCCAGCGCTCGCCGCC
GTGTAAGCGTGCAGTGGGGCGTCCGGCTGTCGTGATCTGACCGCAGTCAT
GTCCGAGGACCCGAGCTCTCAACCTTGGTCCATCGACAAGGATGACTATG
AGCTACAGGAGGTGATCGgtgagctaatccaccacacatcagcatctcaa
tcacacgagtgacagaaaacggagagtaatgcgagggtgtttatatcggt
gtggccctgatgatctgtgttcggttcagatctccatcagtgattgagtca
    
```

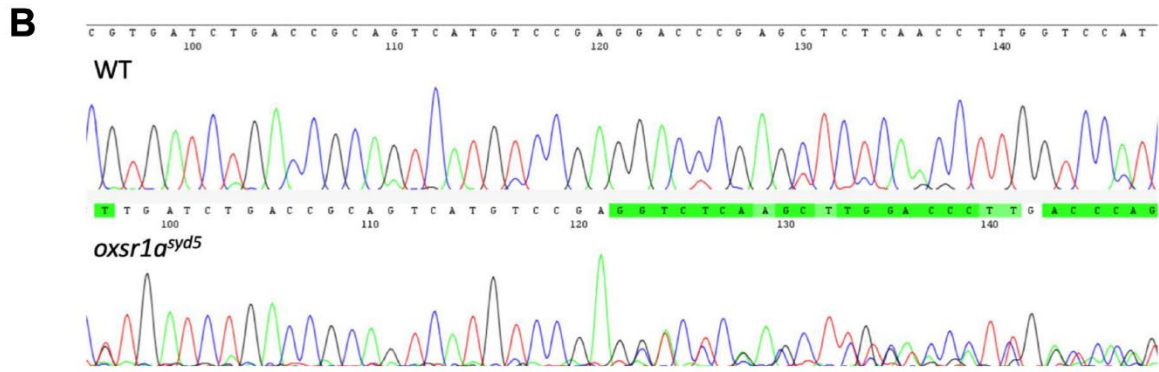

WT: CCGAGGACCCGAGCTCTCAACCTT  
*oxsr1a<sup>syd5</sup>*: CCGAG-----CTCTCAACCTT

**C** WT: MSED PSSQPWSIDKDDYELQ  
*oxsr1a<sup>syd5</sup>*: MSELSTLVHRQGStop

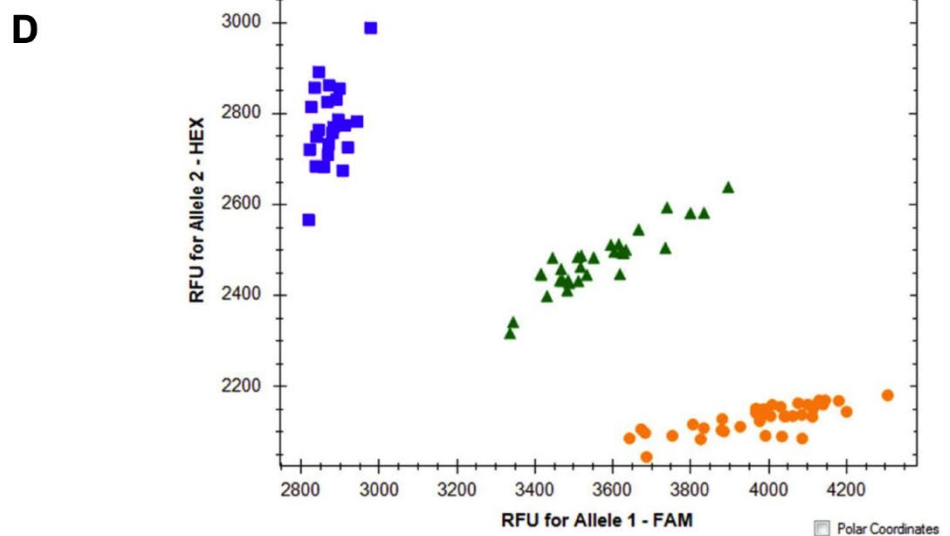

670 **Extended Data 2**

671 Generation of the *oxsr1a<sup>syd5</sup>* allele.

672 A) Map of primer binding sites (blue) and gRNA binding site (pink) around the *oxsr1a<sup>syd5</sup>* allele.

673 Sequence shows exon 1 (upper case) and part of intron 1 (lower case) of *oxsr1a* B)

674 Chromatograms showing partial sequence of the *oxsr1a<sup>syd5</sup>* allele. C) Predicted OXSR1 protein

675 sequence of the *oxsr1a<sup>syd5</sup>* allele. D) Representative genotyping results of hetxhet F2 cross.

676 FAM = WT allele; HEX = *oxsr1a<sup>syd5</sup>* allele.

677

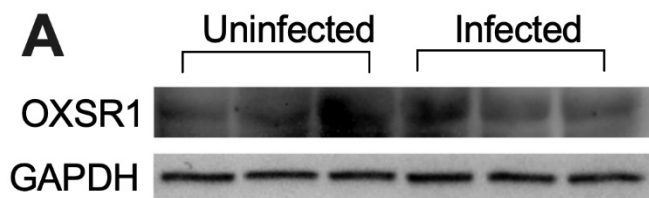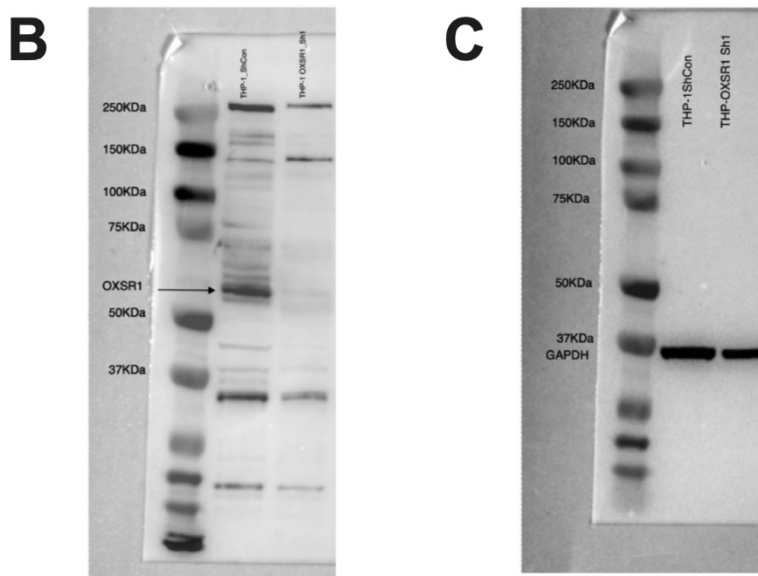

678

679 **Extended Data 3**

680 A) Western blot of OXSR1 and GAPDH protein levels in 3 dpi PMA-differentiated *M.*

681 *tuberculosis*-infected THP-1 cells. Full western blots showing OXSR1 (B) and GAPDH (C)

682 protein levels in THP-1 control and knockdown cell lines.

683

684 **Table 1**

685 Primers used for gene expression studies.

686

|                  | Sequence 5'-3'       |
|------------------|----------------------|
| Oxsr1a qFw       | gctgctttacggtcaccaag |
| Oxsr1a qRv       | attttagccgagtcctgcc  |
| Stk39 qFw        | gatcgagatgttgccgtga  |
| Stk39 qRv        | gatatcgatggtacggcgca |
| EF1a qFw         | tgccttcgtccaatttcag  |
| EF1a qRv         | taccctccttgcgctcaatc |
| IL-1 $\beta$ qFW | atcaaaccatccacagagt  |
| IL-1 $\beta$ qRv | ggcactgaagacaccagtt  |

687

688 **Table 2**

689 Primers used to generate gRNAs for CRISPR-Cas9 knockdown.

|                 | Sequence 5'-3'                                            |
|-----------------|-----------------------------------------------------------|
| il1b_Target_1   | TAATACGACTCACTATAGGGTTCAGATCCGCTTGCAAGTTTTAGAGCTAGAAATAGC |
| il1b_Target_2   | TAATACGACTCACTATAGGCATGGCGAACGTCATCCAGTTTTAGAGCTAGAAATAGC |
| il1b_Target_3   | TAATACGACTCACTATAGGCACTGGGCGACGCATACGGTTTTAGAGCTAGAAATAGC |
| il1b_Target_4   | TAATACGACTCACTATAGGCAGCTGGTCGTATCCGTTGTTTTAGAGCTAGAAATAGC |
| oxsr1a_Target_1 | TAATACGACTCACTATAGGGTTGAGAGCTCGGGTCCTGTTTTAGAGCTAGAAATAGC |
| oxsr1a_Target_2 | TAATACGACTCACTATAGGGCACCTCTCTTAGTATGGGTTTTAGAGCTAGAAATAGC |
| oxsr1a_Target_3 | TAATACGACTCACTATAGGTCCAGTCTCTAAACACGGGTTTTAGAGCTAGAAATAGC |
| oxsr1a_Target_4 | TAATACGACTCACTATAGGAGCGGTGCCGAATGCGGGTTTTAGAGCTAGAAATAGC  |

|                           |                                                                                |
|---------------------------|--------------------------------------------------------------------------------|
| scramble_target_1         | TAATACGACTCACTATAGGCAGGCAAAGAATCCCTGCCGTTTTAGAGCTAGAAATAGC                     |
| scramble_target_2         | TAATACGACTCACTATAGGTACAGTGGACCTCGGTGTCGTTTTAGAGCTAGAAATAGC                     |
| scramble_target_3         | TAATACGACTCACTATAGGCTTCATACAATAGACGATGGTTTTAGAGCTAGAAATAGC                     |
| scramble_target_4         | TAATACGACTCACTATAGGTCGTTTTGCAGTAGGATCGGTTTAGAGCTAGAAATAGC                      |
| si:zfos-364h11.1_Target_1 | TAATACGACTCACTATAGGTATAGAGACTCTTTGTACGTTTTAGAGCTAGAAATAGC                      |
| si:zfos-364h11.1_Target_2 | TAATACGACTCACTATAGGGATCTGATTAGTTGCTGCGTTTTAGAGCTAGAAATAGC                      |
| si:zfos-364h11.1_Target_3 | TAATACGACTCACTATAGGGCTTCGTCCTGAATTCAGTTTTAGAGCTAGAAATAGC                       |
| si:zfos-364h11.1_Target_4 | TAATACGACTCACTATAGGAGCTCTCTTAGTGAGTTTGTGTTTTAGAGCTAGAAATAGC                    |
| STK39_Target_1            | TAATACGACTCACTATAGGGTAGTAGGTGACCACGTTGTTTTAGAGCTAGAAATAGC                      |
| STK39_Target_2            | TAATACGACTCACTATAGGGACCTGCTCCATTACTTCGTTTTAGAGCTAGAAATAGC                      |
| STK39_Target_3            | TAATACGACTCACTATAGGAGAACGATCCTCCCTCGCGTTTTAGAGCTAGAAATAGC                      |
| STK39_Target_4            | TAATACGACTCACTATAGGCAGGTGTCCACTCGACCCGTTTTAGAGCTAGAAATAGC                      |
| tnfa_Target_1             | TAATACGACTCACTATAGGTTGAGAGTCGGGCGTTTTGTTTTAGAGCTAGAAATAGC                      |
| tnfa_Target_2             | TAATACGACTCACTATAGGTCTGCTTCACGCTCCATAGTTTTAGAGCTAGAAATAGC                      |
| tnfa_Target_3             | TAATACGACTCACTATAGGGATTATCATTCCCAGATGAGTTTTAGAGCTAGAAATAGC                     |
| tnfa_Target_4             | TAATACGACTCACTATAGGTCCTGCGTGCAGATTGAGTTTTAGAGCTAGAAATAGC                       |
| Scaffold                  | AAAAGCACCGACTCGGTGCCACTTTTTCAAGTTGATAACGGACTAGCCTTATTTAACTTGCTATTTCTAGCTCTAAAC |

690

691 **Table 3**



692 Primers used for genotyping the *oxsr1a<sup>syd5</sup>* allele.

|               | Sequence 5'-3'          |
|---------------|-------------------------|
| Oxsr1a Fw 1   | aagtttgctgttgggactg     |
| Oxsr1a Rv 1   | agatgctgatgtgtggtgga    |
| Oxsr1a Fw 2   | ctgtttcagGCTCAGTGCTT    |
| Oxsr1a Rv 2   | TCCAGCCTTCACATCCctac    |
| Oxsr1a Fw 3-4 | gtttttccacagtctctggtttt |
| Oxsr1a Rv 3-4 | ccttctggaggcacaagag     |

693

694 **Table 4**

695 Survival data of zebrafish embryos treated at 1 day post fertilization with varying  
696 concentrations of Compound B (CB). Drug was administered once at the beginning of the  
697 experiment.

| CB ( $\mu$ M) | % Survival |       |        |
|---------------|------------|-------|--------|
|               | 24hrs      | 48hrs | 120hrs |
| 0.9           | 100        | 100   | 100    |
| 1.8           | 100        | 100   | 100    |
| 3.6           | 100        | 100   | 47     |
| 7.5           | 100        | 47    | 0      |
| 15            | 5.8        | 0     | 0      |
| 30            | 0          | 0     | 0      |

698
